# Supplementary material for: Too Hot to Handle: Effects of Water Temperature on the Early Life Stages of Gongolaria barbata (Fucales)
Source: MDPI journal article supplement (doi:10.3390/jmse12030514), 2024-03-20
Supplement: s1 [file s1]

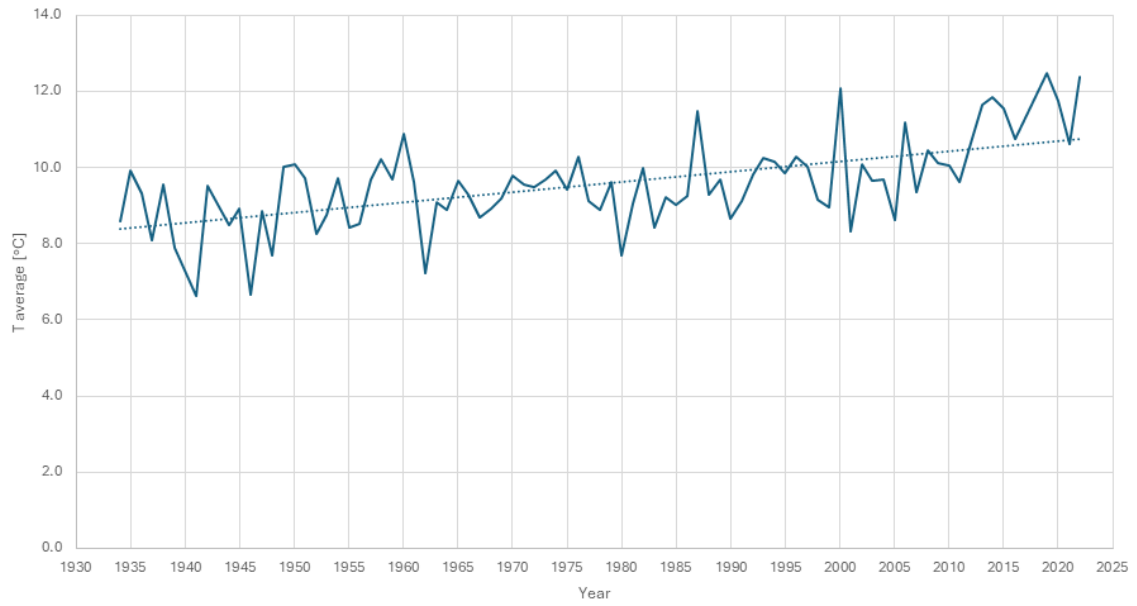

**Figure S1:** Average winter temperatures (December–February) in the Gulf of Trieste in the period 1934–2022 (data from SEANOE database [96]).

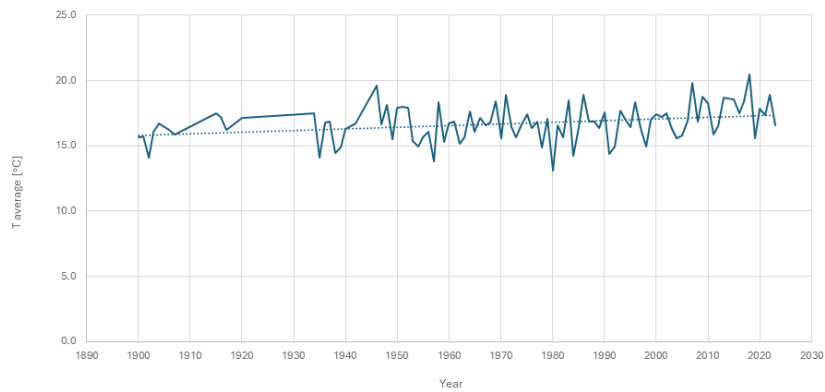

**Figure S2:** Average late spring (May) temperatures in the Gulf of Trieste in the period 1934–2022 (data from SEANOE database [96]).
